# Supplementary material for: Refined spatial temporal epigenomic profiling reveals intrinsic connection between PRDM9-mediated H3K4me3 and the fate of double-stranded breaks
Source: PubMed Central journal article supplement (PMC7054334; doi:10.1038/s41422-020-0281-1), 2020-02-11
Supplement: 41422_2020_281_MOESM1_ESM.pdf [file 41422_2020_281_MOESM1_ESM.pdf]

## Supplementary information, Figure S1

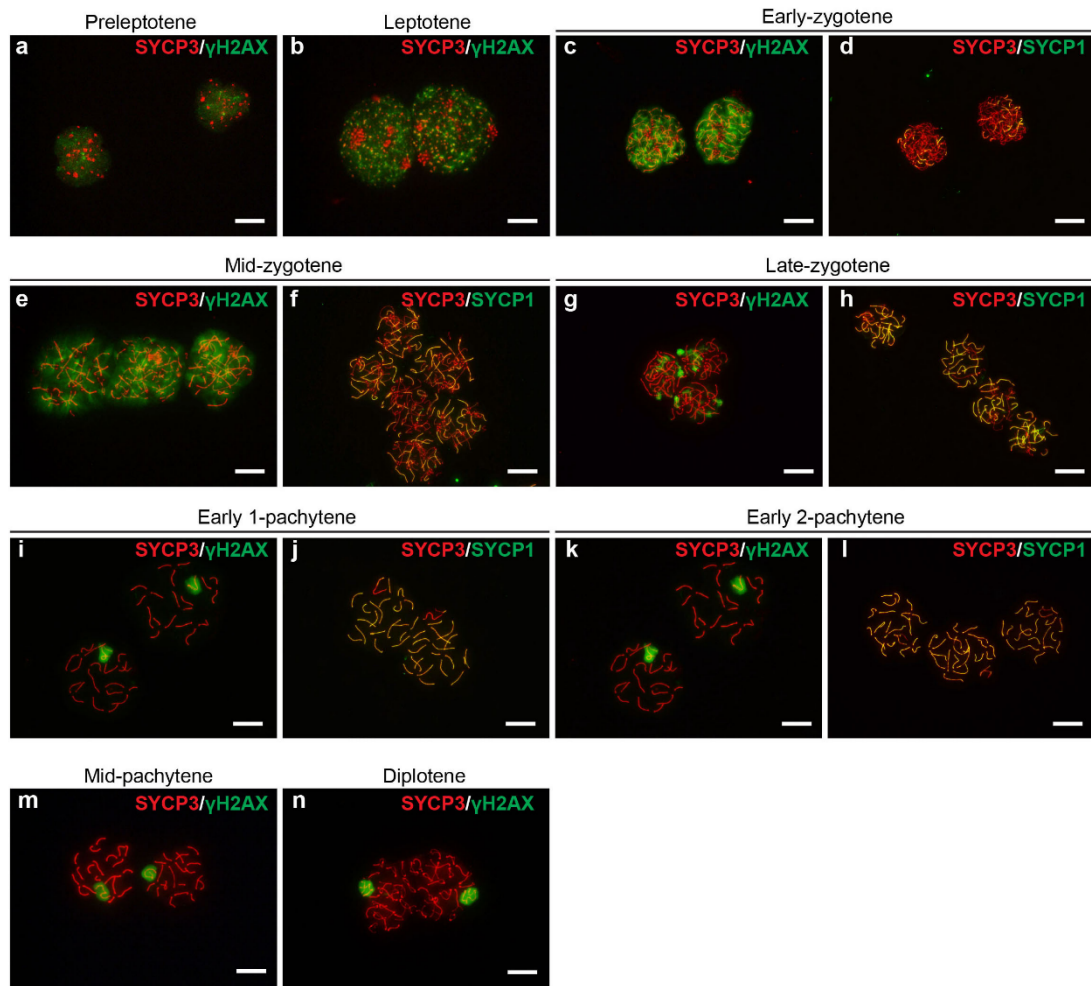

**Fig. S1 Validation of the isolated spermatocytes by surface-spread chromatin immunofluorescence staining.** a-n Surface-spread nuclei immunofluorescence staining for SYCP3 (red)/ $\gamma$ H2AX (green) or SYCP3 (red)/SYCP1 (green) of the isolated spermatocytes, including preleptotene spermatocytes (a), leptotene spermatocytes (b), early-zygotene spermatocytes (c, d), mid-zygotene spermatocytes (e, f), late-zygotene spermatocytes (g, h), early 1-pachytene spermatocytes (i, j), early 2-pachytene spermatocytes (k, l), mid-pachytene spermatocytes (m), and diplotene spermatocytes (n). Scale bars, 40  $\mu$ m.
