# Supplementary material for: Refined spatial temporal epigenomic profiling reveals intrinsic connection between PRDM9-mediated H3K4me3 and the fate of double-stranded breaks
Source: PubMed Central journal article supplement (PMC7054334; doi:10.1038/s41422-020-0281-1), 2020-02-11
Supplement: 41422_2020_281_MOESM3_ESM.pdf [file 41422_2020_281_MOESM3_ESM.pdf]

## Supplementary information, Figure S3

**a**

Newly generated H3K4me3 peaks

| Rank | Motif                                                                             | P-value | log P-value | % of Targets | % of Background | STD(Bg STD)       | Best Match/Details                                                                                                                  |
|------|-----------------------------------------------------------------------------------|---------|-------------|--------------|-----------------|-------------------|-------------------------------------------------------------------------------------------------------------------------------------|
| 1    |  | 1e-777  | -1.791e+03  | 44.61%       | 4.84%           | 123.3bp (236.3bp) | PRDM9(Zf)/Testis-DMC1-ChIP-Seq(GSE35498)/Homer(0.935)<br><a href="#">More Information</a> <a href="#">Similar Motifs Found</a>      |
| 2    |  | 1e-46   | -1.062e+02  | 1.60%        | 0.08%           | 188.3bp (217.5bp) | PB0041.1_MafB_1/Jaspar(0.651)<br><a href="#">More Information</a> <a href="#">Similar Motifs Found</a>                              |
| 3    |  | 1e-44   | -1.027e+02  | 1.56%        | 0.00%           | 215.6bp (0.0bp)   | KLF10(Zf)/HEK293-KLF10.GFP-ChIP-Seq(GSE58341)/Homer(0.650)<br><a href="#">More Information</a> <a href="#">Similar Motifs Found</a> |
| 4    |  | 1e-38   | -8.898e+01  | 1.40%        | 0.09%           | 206.7bp (0.0bp)   | Tcf3(HMG)/mES-Tcf3-ChIP-Seq(GSE11724)/Homer(0.555)<br><a href="#">More Information</a> <a href="#">Similar Motifs Found</a>         |

**b**

Common H3K4me3 peaks

| Rank | Motif                                                                              | P-value | log P-value | % of Targets | % of Background | STD(Bg STD)       | Best Match/Details                                                                                                            |
|------|------------------------------------------------------------------------------------|---------|-------------|--------------|-----------------|-------------------|-------------------------------------------------------------------------------------------------------------------------------|
| 1    |   | 1e-3743 | -8.620e+03  | 52.10%       | 0.14%           | 198.1bp (88.6bp)  | PB0199.1_Zfp161_2/Jaspar(0.600)<br><a href="#">More Information</a> <a href="#">Similar Motifs Found</a>                      |
| 2    |   | 1e-3143 | -7.238e+03  | 45.25%       | 0.03%           | 189.4bp (76.2bp)  | PB0010.1_Egr1_1/Jaspar(0.678)<br><a href="#">More Information</a> <a href="#">Similar Motifs Found</a>                        |
| 3    |   | 1e-3050 | -7.024e+03  | 44.16%       | 0.02%           | 202.4bp (50.1bp)  | Sp1(Zf)/Promoter/Homer(0.613)<br><a href="#">More Information</a> <a href="#">Similar Motifs Found</a>                        |
| 4    |   | 1e-3035 | -6.990e+03  | 43.99%       | 0.02%           | 196.6bp (40.8bp)  | POL013.1_MED-1/Jaspar(0.701)<br><a href="#">More Information</a> <a href="#">Similar Motifs Found</a>                         |
| 5    |   | 1e-2971 | -6.842e+03  | 70.09%       | 1.41%           | 206.2bp (212.5bp) | Sp5(Zf)/mES-Sp5.Flag-ChIP-Seq(GSE72989)/Homer(0.588)<br><a href="#">More Information</a> <a href="#">Similar Motifs Found</a> |
| 6    |  | 1e-2900 | -6.679e+03  | 64.47%       | 1.00%           | 207.6bp (137.3bp) | E2F6/MA0471.1/Jaspar(0.905)<br><a href="#">More Information</a> <a href="#">Similar Motifs Found</a>                          |

**Fig. S3 PRDM9 DNA binding motif identified in the newly generated H3K4me3 peaks but not in common ones. a, b** Identification of the predicted PRDM9 binding motif (B6 background) on the newly generated H3K4me3 peaks (**a**) and common H3K4me3 peaks (**b**).
