# Supplementary material for: Refined spatial temporal epigenomic profiling reveals intrinsic connection between PRDM9-mediated H3K4me3 and the fate of double-stranded breaks
Source: PubMed Central journal article supplement (PMC7054334; doi:10.1038/s41422-020-0281-1), 2020-02-11
Supplement: 41422_2020_281_MOESM6_ESM.pdf [file 41422_2020_281_MOESM6_ESM.pdf]

## Supplementary information, Figure S6

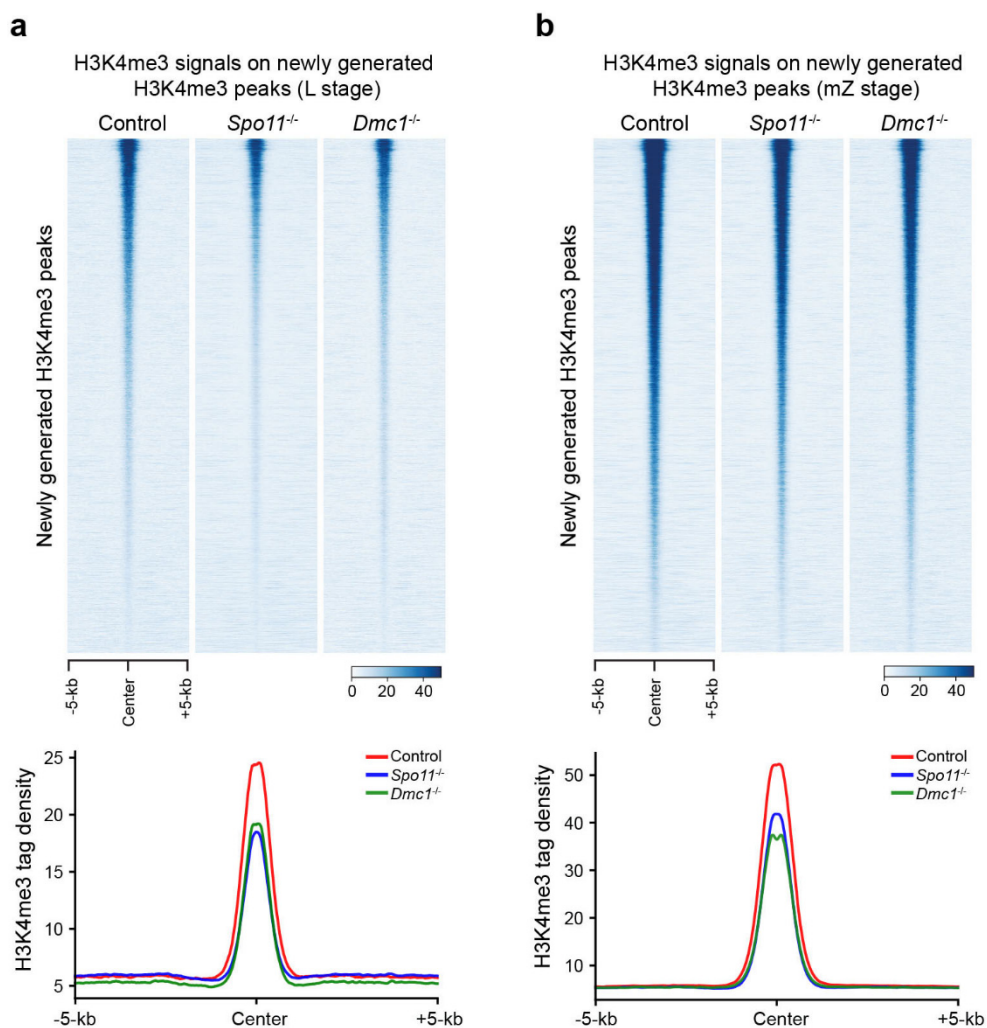

**Fig. S6 H3K4me3 peaks are present at the sites of DSB hotspots in *Spo11* KO and *Dmc1* KO spermatocytes. a, b** Heatmaps (top) and profiles (bottom) of normalized H3K4me3 ChIP-seq tag density on the newly generated H3K4me3 peaks in control, *Spo11*<sup>-/-</sup> and *Dmc1*<sup>-/-</sup> leptotene (a) and mid-zygotene (b) spermatocytes. Each row in heatmap represents a DSB hotspot of  $\pm 5$  kb around the center and ranked by the H3K4me3 tag density from highest to lowest. H3K4me3 tag density was calculated using H3K4me3 reads with 50-bp resolution.
