# Supplementary material for: Refined spatial temporal epigenomic profiling reveals intrinsic connection between PRDM9-mediated H3K4me3 and the fate of double-stranded breaks
Source: PubMed Central journal article supplement (PMC7054334; doi:10.1038/s41422-020-0281-1), 2020-02-11
Supplement: 41422_2020_281_MOESM9_ESM.pdf [file 41422_2020_281_MOESM9_ESM.pdf]

## Supplementary information, Figure S9

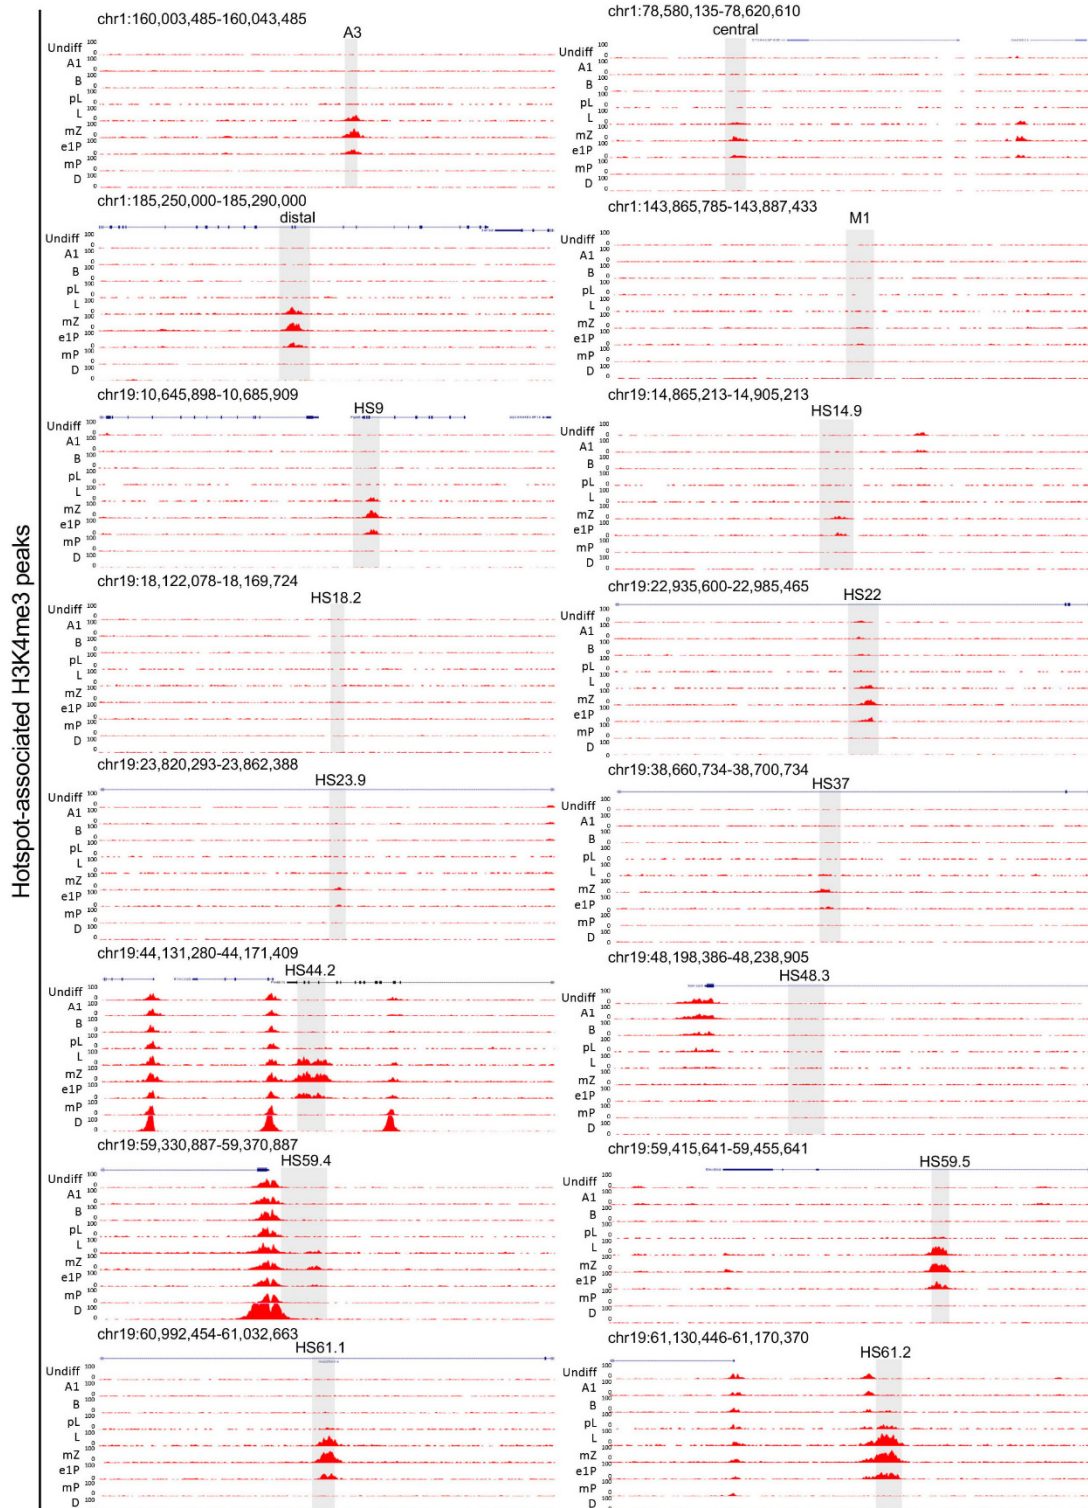

**Fig. S9** 14 of 16 known crossover hotspots contain hotspot-associated H3K4me3 that are present from leptotene to early 1-pachytene. UCSC genome browser view

of H3K4me3 reads coverage on 16 known crossover hotspots in different stages of spermatogonia, and various substages of meiotic prophase I cells. The positions of crossover hotspots are highlighted in the light black shading. Undiff: undifferentiated spermatogonia, A1: type A1 spermatogonia, B: type B spermatogonia, pL: mid-preleptotene, L: leptotene, mZ: mid-zygotene, e1P: early 1-pachytene, mP: mid-pachytene, D: diplotene.
