# Supplementary material for: Refined spatial temporal epigenomic profiling reveals intrinsic connection between PRDM9-mediated H3K4me3 and the fate of double-stranded breaks
Source: PubMed Central journal article supplement (PMC7054334; doi:10.1038/s41422-020-0281-1), 2020-02-11
Supplement: 41422_2020_281_MOESM12_ESM.pdf [file 41422_2020_281_MOESM12_ESM.pdf]

## Supplementary information, Figure S12

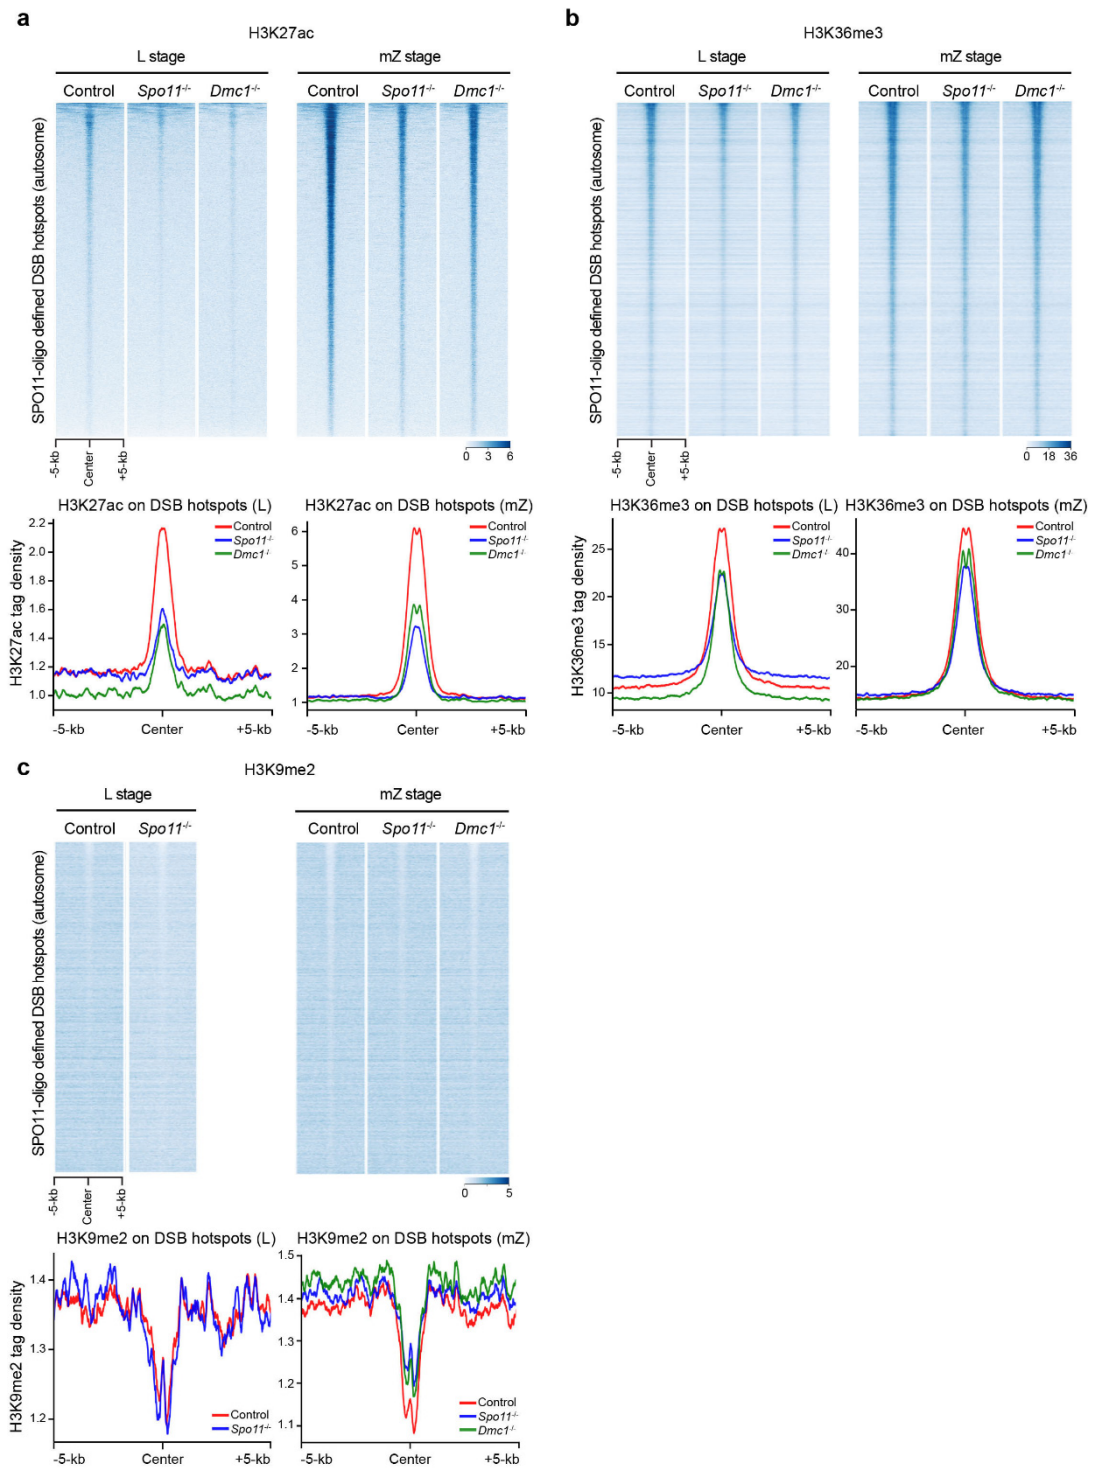

**Fig. S12 H3K27ac and H3K36me3 peaks, as well as H3K9me2 dips are present at the sites of DSB hotspots in *Spo11*<sup>-/-</sup> and *Dmc1*<sup>-/-</sup> spermatocytes. a** Heatmaps (top)

and profiles (bottom) of H3K27ac tag density on the SPO11-oligo defined DSB hotspots in control, *Spo11<sup>-/-</sup>* and *Dmc1<sup>-/-</sup>* leptotene (left) or mid-zygotene (right) spermatocytes. Each row in heatmaps represents a DSB hotspot of  $\pm 5$  kb around the center and ranked by SPO11-oligo density from highest and lowest. Color indicates CHIP-seq tag density. Average CHIP-seq tag density was calculated using CHIP-seq reads coverage with 50-bp resolution. **b** Heatmaps (top) and profiles (bottom) of H3K36me3 tag density on the SPO11-oligo defined DSB hotspots in control, *Spo11<sup>-/-</sup>* and *Dmc1<sup>-/-</sup>* leptotene (left) or mid-zygotene (right) spermatocytes. Each row in heatmaps represents a DSB hotspot of  $\pm 5$  kb around the center and ranked by SPO11-oligo density from highest and lowest. Color indicates CHIP-seq tag density. Average CHIP-seq tag density was calculated using CHIP-seq reads coverage with 50-bp resolution. **c** Heatmaps (top) and profiles (bottom) of H3K9me2 tag density on the SPO11-oligo defined DSB hotspots in control, *Spo11<sup>-/-</sup>* and *Dmc1<sup>-/-</sup>* leptotene (left) or mid-zygotene (right) spermatocytes. Each row in heatmaps represents a DSB hotspot region of  $\pm 5$  kb around the center and ranked by SPO11-oligo density from highest and lowest. Color indicates CHIP-seq tag density. Average CHIP-seq tag density was calculated using CHIP-seq reads coverage with 50-bp resolution.
