# Supplementary material for: Refined spatial temporal epigenomic profiling reveals intrinsic connection between PRDM9-mediated H3K4me3 and the fate of double-stranded breaks
Source: PubMed Central journal article supplement (PMC7054334; doi:10.1038/s41422-020-0281-1), 2020-02-11
Supplement: 41422_2020_281_MOESM15_ESM.pdf [file 41422_2020_281_MOESM15_ESM.pdf]

## Supplementary information, Figure S15

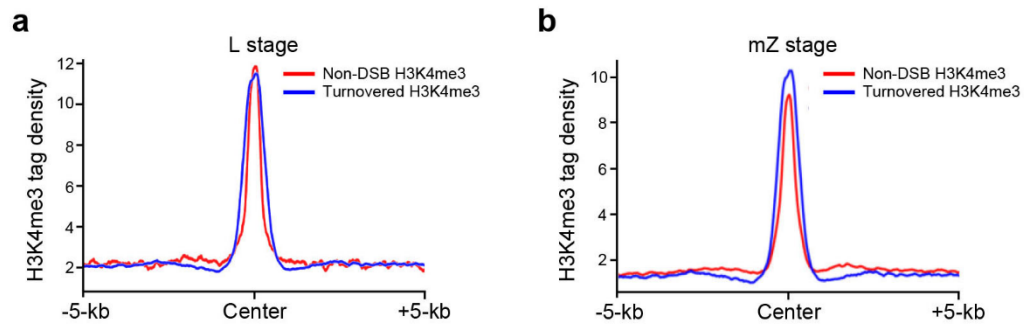

**Fig. S15** The strength of non-hotspot PRDM9-mediated H3K4me3 in both leptotene and zygotene is similar to that of fast- and slow-turnover H3K4me3. **a, b** Profile of the average H3K4me3 tag density on non-hotspot H3K4me3 (non-DSB H3K4me3) peaks and fast- and slow-turnover H3K4me3 (turnovered H3K4me3) peaks in leptotene stage (**a**) and mid-zygotene stage (**b**). H3K4me3 tag density was calculated using H3K4me3 read coverage with 50-bp resolution.
